# Supplementary material
Source: Springer Nature journal article supplement (https://www.springermedizin.de/resource/supplementary/12984_2008_160_MOESM4_ESM.pdf/9605430)

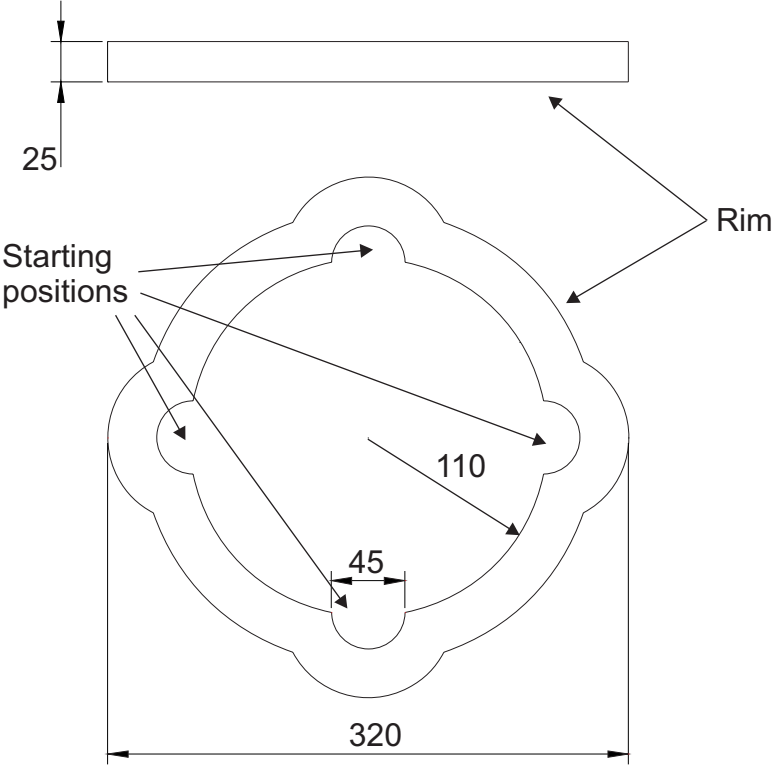

Supplement: MOESM4 [file 9605430]
